# Supplementary material
Source: PubMed Central journal article supplement (PMC3798040)
Supplement: NIHMS519347-supplement-01.pdf [file NIHMS519347-supplement-01.pdf]

## Supporting Information

**Figure 1.** Impact of inhibition of actin polymerization by latrunculin B in huMCs on SCF-induced signaling events. **(A-B)** Non-sensitized and cytokine-starved huMCs were pre-treated (La+), or not (La-), with latrunculin B (1  $\mu$ M) for 20 min, then activated, or not (Ctrl), with SCF (100 ng/ml) for 2 min. The cells were lysed and analyzed by immunoblotting. Immunoblots were normalized to  $\beta$ -actin as a loading control and evaluated. Data are shown as mean and SEM of n=3 donors. \*P<0.05, Student's t-test, between latrunculin B-treated and non-treated cells.

**Figure 2.** The flow cytometry gating strategy used in the evaluations. **(A)** The intact cells in the F-actin labeling assays were considered as a single cell population within the side (SSC-H) and forward scatter (FSC-H) plot. **(B)** The dead cells in the viability assays were defined as PI and AnnexinV-FITC positive population.

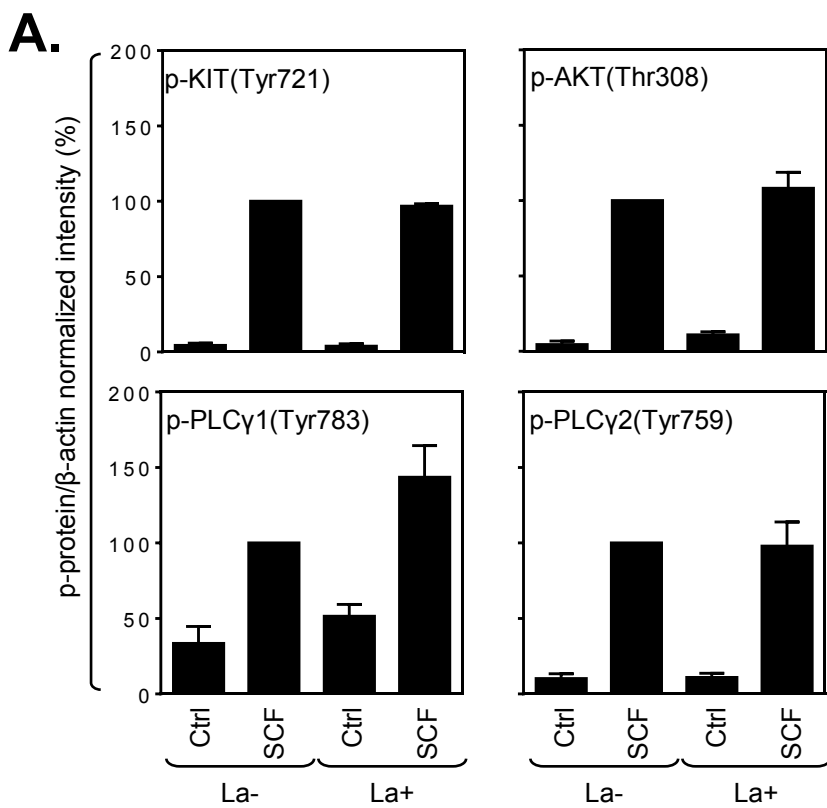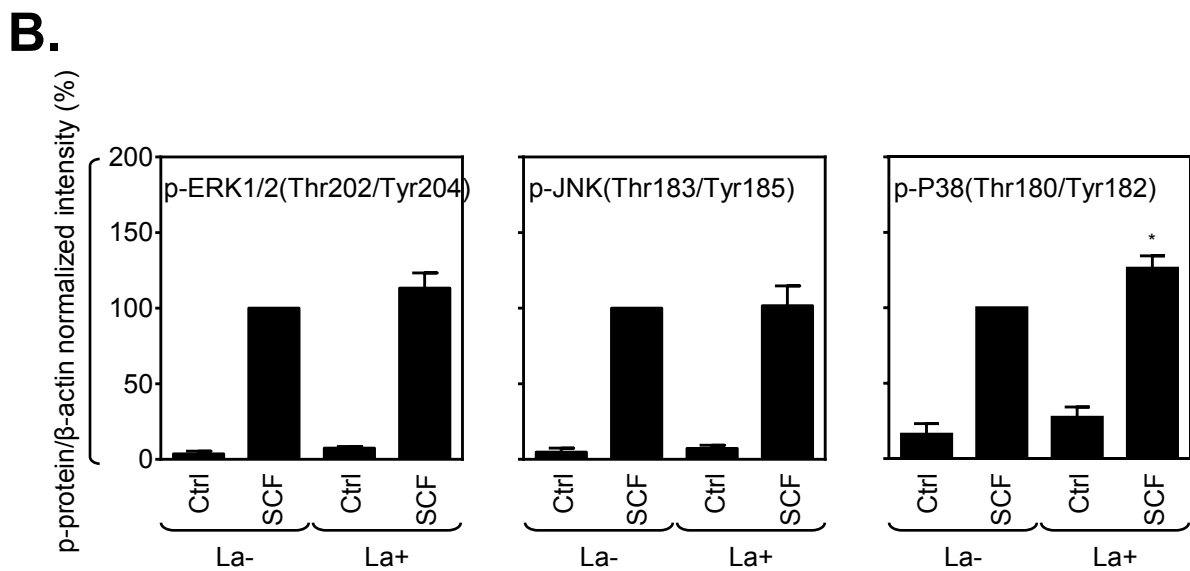

Figure 1

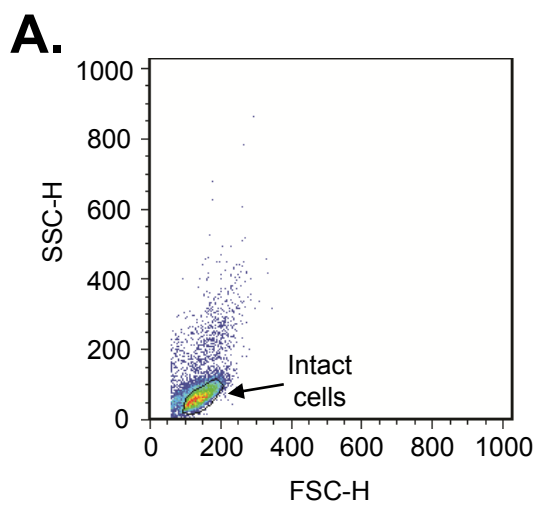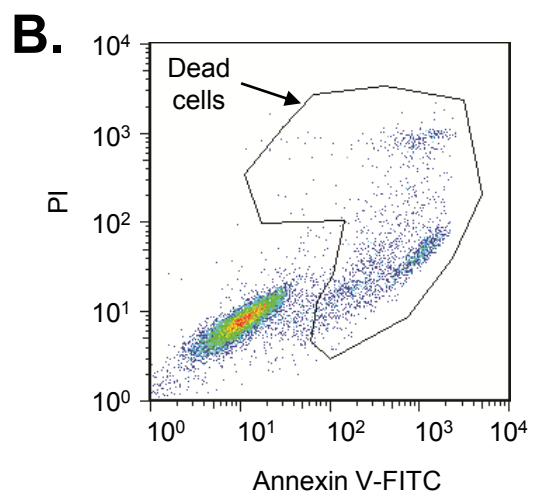

Figure 2
